# Supplementary material for: Untangling Extracellular Proteasome-Osteopontin Circuit Dynamics in Multiple Sclerosis
Source: PubMed Central journal article supplement (PMC6468732; doi:10.3390/cells8030262), 2019-03-20
Supplement: cells-08-00262-s001.pdf [file cells-08-00262-s001.pdf]

## Untangling extracellular proteasome-osteopontin circuit dynamics in multiple sclerosis

Dianzani *et al.*

### List of supplementary material

|           |                                                                                                      |
|-----------|------------------------------------------------------------------------------------------------------|
| Table S1  | Mathematical model variables                                                                         |
| Table S2  | Mathematical model parameters                                                                        |
| Table S3  | Characteristics of healthy and RRMS donors enrolled in the prospective study                         |
| Figure S1 | Proteasomes derived from serum of either RRMS patient or healthy controls can degrade OPNs           |
| Figure S2 | The MSSS' cannot be predicted based on single components of the extracellular OPN-proteasome circuit |

| variable | description                                                  |
|----------|--------------------------------------------------------------|
| $p_s$    | Standard proteasome                                          |
| $p_i$    | immunoproteasome                                             |
| $OPN_F$  | OPN-FL                                                       |
| $OPN_N$  | OPN-N                                                        |
| $OPN_C$  | OPN-C                                                        |
| $F_{sf}$ | OPN-FL-derived fragments produced by standard proteasome     |
| $F_{sn}$ | OPN-N-derived fragments produced by standard proteasome      |
| $F_{sc}$ | OPN-C-derived fragments produced by standard proteasome      |
| $F_{if}$ | OPN-FL-derived fragments produced by immunoproteasome        |
| $F_{in}$ | OPN-N-derived fragments produced by immunoproteasome         |
| $F_{ic}$ | OPN-C-derived-derived fragments produced by immunoproteasome |

**Table S1. Mathematical model variables.**

| parameters                         | description                                                                                        |
|------------------------------------|----------------------------------------------------------------------------------------------------|
| <i>transport dynamics</i>          |                                                                                                    |
| $K_{in}$                           | rate of proteasome release into blood vessel                                                       |
| $K_{deg}$                          | rate of proteasome degradation                                                                     |
| $K_1$                              | rate of OPN release into blood vessel                                                              |
| $K_{degF}$                         | rate of OPN-FL degradation                                                                         |
| $K_{degN}$                         | rate of OPN-N degradation                                                                          |
| $K_{degC}$                         | rate of OPN-C degradation                                                                          |
| $k_i$                              | rate of inhibition of proteasome release by OPN                                                    |
| $X_t$                              | proportion of initial OPN-FL compared to OPN-N and OPN-C                                           |
| $K_{deg3}$                         | rate of degradation of OPNs-derived fragments                                                      |
| <i>proteasomal OPN degradation</i> |                                                                                                    |
| $kcut_{F,s} \ kcut_{F,i}$          | $v_{max}$ of OPN-FL degradation by standard- and immuno-proteasomes, respectively                  |
| $kcut_{N,s} \ kcut_{N,i}$          | $v_{max}$ of OPN-N degradation by standard- and immuno-proteasomes, respectively                   |
| $kcut_{C,s} \ kcut_{C,i}$          | $v_{max}$ of OPN-C degradation by standard- and immuno-proteasomes, respectively                   |
| $KM_{F,s} \ KM_{F,i}$              | Michaelis-Menten constant for OPN-FL degradation by standard- and immuno-proteasomes, respectively |
| $KM_{N,s} \ KM_{N,i}$              | Michaelis-Menten constant for OPN-N degradation by standard- and immune-proteasomes, respectively  |
| $KM_{C,s} \ KM_{C,i}$              | Michaelis-Menten constant for OPN-C degradation by standard- and immuno-proteasomes, respectively  |
| <i>chemotaxis</i>                  |                                                                                                    |
| $C_{OPNF}$                         | chemotactic index of $OPN_F$                                                                       |
| $C_{OPNN}$                         | chemotactic index of $OPN_N$                                                                       |
| $C_{OPNC}$                         | chemotactic index of $OPN_C$                                                                       |
| $C_{Fsf}$                          | chemotactic index of $F_{sf}$                                                                      |
| $C_{Fsn}$                          | chemotactic index of $F_{sn}$                                                                      |
| $C_{Fsc}$                          | chemotactic index of $F_{sc}$                                                                      |
| $C_{Fif}$                          | chemotactic index of $F_{if}$                                                                      |
| $C_{Fin}$                          | chemotactic index of $F_{in}$                                                                      |
| $C_{Fic}$                          | chemotactic index of $F_{ic}$                                                                      |

**Table S2. Mathematical model parameters.**

|                      | Healthy Controls | RRMS     |
|----------------------|------------------|----------|
| Age (y)              | 31.8±6.7         | 36.9±9.1 |
| Count (n)            | 12               | 21       |
| Gender (M/F)         | 3/9              | 7/14     |
| Disease onset (y)    | -                | 30.3±8.7 |
| Disease duration (y) | -                | 6.9±6.2  |

**Table S3. Characteristics of RRMS donors enrolled in the prospective study.** RRMS patients and healthy donors enrolled in the study from whom we have successfully measured the concentration of proteasome and OPN in at least one serum sample.

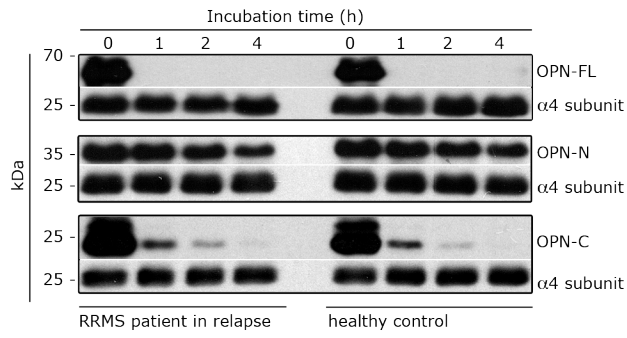

**Figure S1. Proteasomes derived from serum of either RRMS patient or healthy controls can degrade OPNs.** Degradation kinetics of OPNs (OPN-FL, OPN-N and OPN-C) by 20S proteasomes purified from whole blood of either one RRMS patient or an age-matched healthy control are shown by representative Western Blot assay (upper panel; the proteasome  $\alpha 4$  subunit is used as control marker).

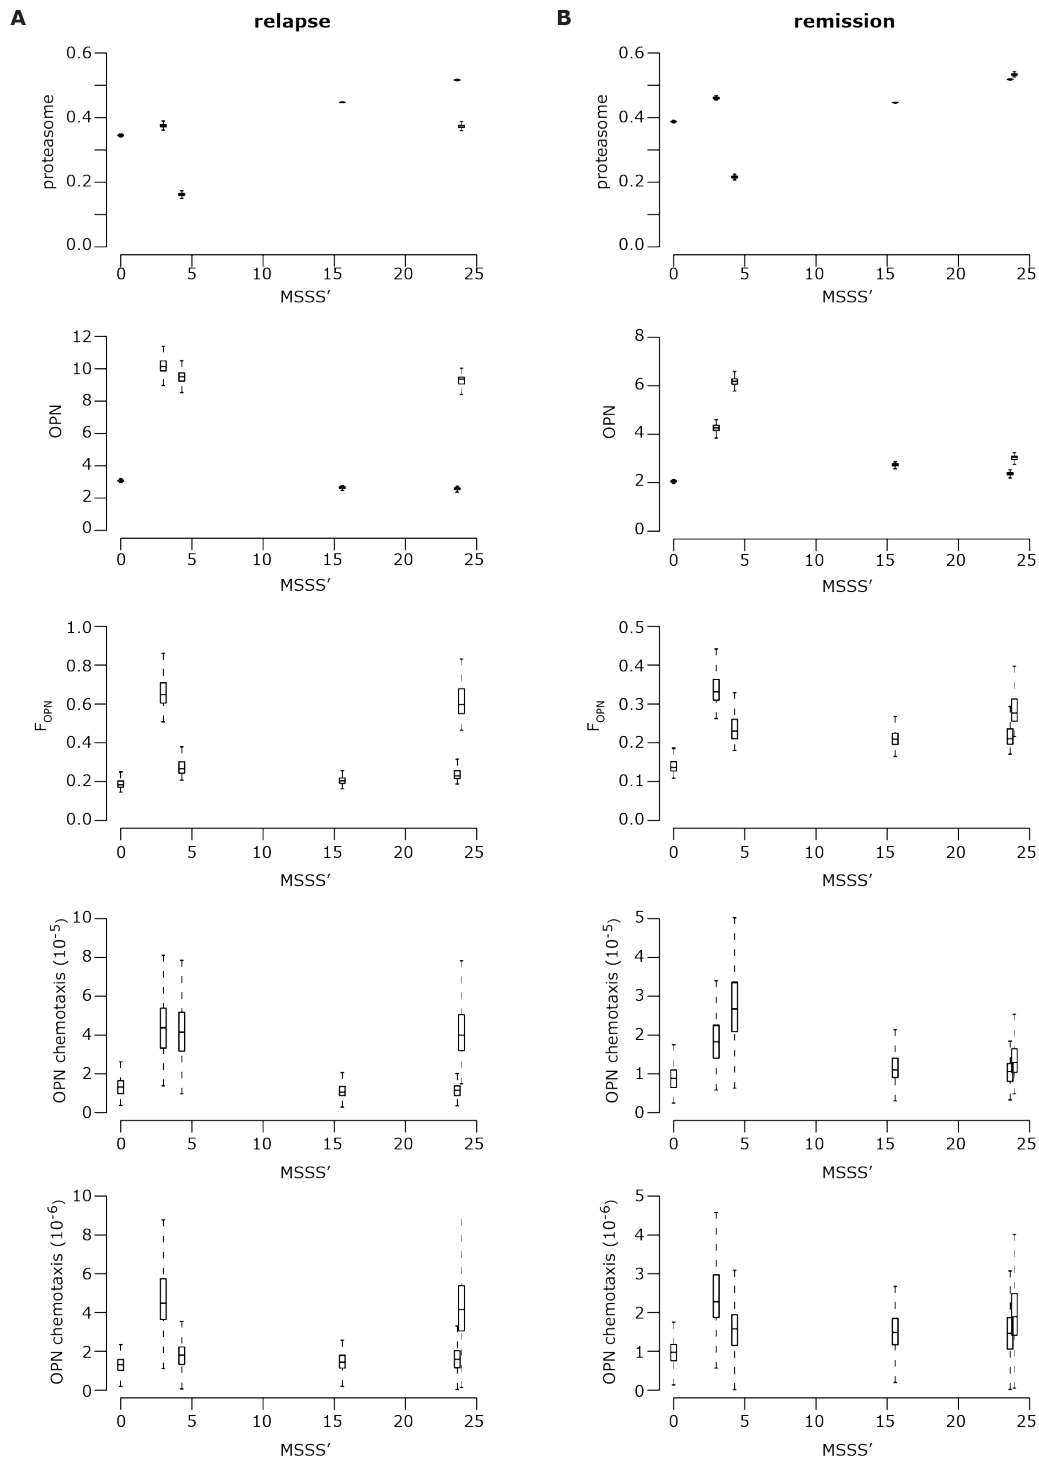

**Figure S2. The MSSS' cannot be predicted based on single components of the extracellular OPN-proteasome circuit.** Simulated pathway components based on single patient data (the six patients of group A) in relapse (A) and remission (B) plotted against the patients' MSSS' values. MSSS' is a marker of the relapse clinical intensity and is defined as the MSSS variation from remission to relapse multiplied by the MSSS in relapse ( $\Delta MSSS * MSSS_{relapse}$ ). No correlations between single components and MSSS' have been detected. Pathway components are plotted as boxplots, indicating the median, 25% and 75% quantiles as the box, and the 5% and 95% quantiles as dashed lines.
